# Supplementary material for: Optimizing Vancomycin Therapy in Critically Ill Children: A Population Pharmacokinetics Study to Inform Vancomycin Area under the Curve Estimation Using Novel Biomarkers
Source: MDPI journal article supplement (doi:10.3390/pharmaceutics15051336), 2023-04-25
Supplement: s1 [file s1]

**Table S1.** Goal PK sampling times relative to end of the vancomycin infusion.

| Dosing interval | <15 min | 30 +/- 10 min | 60 +/-15 min | 180 +/- 30 min | 360 +/- 60 min | 720 +/- 60 min | <30 min prior to next dose |
|-----------------|---------|---------------|--------------|----------------|----------------|----------------|----------------------------|
| Q6H             | X       | X             | X            | X              |                |                | X                          |
| Q8H             | X       | X             | X            | X              |                |                | X                          |
| Q12H            | X       | X             |              | X              | X              |                | X                          |
| Q18H            | X       | X             |              | X              | X              |                | X                          |
| Q24H            | X       |               | X            |                | X              | X              | X                          |

**Table S2.** Model training steps.

| Model                                                                                | Covariates                                                                         | -2*LL ( $\Delta$ )   | AIC ( $\Delta$ )     |
|--------------------------------------------------------------------------------------|------------------------------------------------------------------------------------|----------------------|----------------------|
| <i>Step 1. Base model structure</i>                                                  |                                                                                    |                      |                      |
| 1-compartment                                                                        | (WT/27)**0.75 on CL, (WT/27) on $V_d$                                              | 873.4                | 879.6                |
| <b>2-compartment</b>                                                                 | <b>(WT/27)**0.75 on CL and Q, (WT/27) on V1 and V2</b>                             | <b>812.3</b>         | <b>820.5</b>         |
| <i>Step 2. 2-compartment model + renal function covariates on CL</i>                 |                                                                                    |                      |                      |
| eGFR <sub>Schwartz</sub>                                                             | (GFR/156)**TH1 on CL                                                               | 797.2 (-15.1)        | 807.6 (-12.9)        |
| <b>eGFR<sub>Hoek</sub></b>                                                           | <b>(HOEK/134)**TH1 on CL</b>                                                       | <b>782.9 (-29.4)</b> | <b>793.3 (-27.2)</b> |
| eGFR <sub>FAS</sub>                                                                  | (FAS/144)**TH1 on CL                                                               | 791.1 (-21.2)        | 801.5 (-19.0)        |
| Serum creatinine                                                                     | (0.4/SCR)**TH1 on CL                                                               | 797.2 (-15.1)        | 807.6 (-12.9)        |
| Plasma cystatin c                                                                    | (0.6/PCYSC)**TH1 on CL                                                             | 782.5 (-29.8)        | 793.0 (-27.5)        |
| Plasma NGAL                                                                          | (95/PNGAL)**TH1 on CL                                                              | 796.9 (-15.4)        | 807.3 (-13.2)        |
| <i>Step 3. 2-compartment model with eGFR<sub>Hoek</sub> on CL + other covariates</i> |                                                                                    |                      |                      |
| ARC on CL                                                                            | (CLARC**ARC) on CL; ARC=1 if eGFR <sub>Hoek</sub> > 130 ml/min/1.73 m <sup>2</sup> | 777.2 (-5.7)         | 789.8 (-3.5)         |
| Age on CL                                                                            | ((AGE/10)**TH2) on CL                                                              | 778.8 (-4.1)         | 791.4 (-1.9)         |
| Age as Hill function on CL                                                           | (AGE**HILL/((AGE50**HILL)+(AGE**HILL))) on CL                                      | 777.9 (-5.0)         | 792.7 (-0.6)         |
| Age on V1                                                                            | ((AGE/10)**TH2) on V1                                                              | 778.0 (-4.9)         | 790.6 (-2.7)         |
| Female sex on CL                                                                     | (TH2**FEM); FEM=1 if female, 0 if male                                             | 776.7 (-6.2)         | 789.3 (-4.0)         |
| Female sex on V1                                                                     | (TH2**FEM); FEM=1 if female, 0 if male                                             | 780.6 (-2.3)         | 793.1 (-0.2)         |
| Vasopressor receipt on CL                                                            | TH2**VASO on CL; VASO=1 if active vasopressor receipt                              | 774.8 (-8.1)         | 787.4 (-5.9)         |
| Vasopressor receipt on V1                                                            | TH2**VASO on V1; VASO=1 if active vasopressor receipt                              | 779.3 (-3.6)         | 791.9 (-1.4)         |

|                                                                                                                                                                                                                                                                                                                                                |                                                                        |                      |                     |
|------------------------------------------------------------------------------------------------------------------------------------------------------------------------------------------------------------------------------------------------------------------------------------------------------------------------------------------------|------------------------------------------------------------------------|----------------------|---------------------|
| PIM3 score on CL                                                                                                                                                                                                                                                                                                                               | (PIM3/2.82)**TH2 on CL                                                 | 779.1 (-3.8)         | 791.7 (-1.6)        |
| PIM3 score on V1                                                                                                                                                                                                                                                                                                                               | (PIM3/2.82)**TH2 on V1                                                 | 777.7 (-5.2)         | 790.3 (-3.0)        |
| SCr on CL                                                                                                                                                                                                                                                                                                                                      | (0.4/SCR)**TH1 on CL                                                   | 777.1 (-5.8)         | 789.7 (-3.6)        |
| Plasma NGAL on CL                                                                                                                                                                                                                                                                                                                              | (95/PNGAL)**TH1 on CL                                                  | 777.5 (-5.4)         | 790.1 (-3.2)        |
| Urinary NGAL on CL                                                                                                                                                                                                                                                                                                                             | (50.1/UNGAL)**TH2 on CL                                                | 774.3 (-8.6)         | 786.9 (-6.4)        |
| <b>Log urinary NGAL on CL</b>                                                                                                                                                                                                                                                                                                                  | <b>TH2**LUNGAL on CL; LUNGAL is the natural logarithm of uNGAL/UCr</b> | <b>771.3 (-11.6)</b> | <b>783.9 (-9.4)</b> |
| Urinary KIM-1 on CL                                                                                                                                                                                                                                                                                                                            | (3.3/UKIM1)**TH2 on CL                                                 | 778.3 (-4.6)         | 790.9 (-2.4)        |
| Log urinary KIM-1 on CL                                                                                                                                                                                                                                                                                                                        | TH2**LUKIM1 on CL; LUKIM1 is the natural logarithm of uKIM-1/UCr       | 775.1 (-7.8)         | 787.7 (-5.6)        |
| Urinary OPN on CL                                                                                                                                                                                                                                                                                                                              | (4900/UOPN)**TH2 on CL                                                 | 779.6 (-3.3)         | 792.2 (-1.1)        |
| Log urinary OPN on CL                                                                                                                                                                                                                                                                                                                          | TH2**LUOPN on CL; LUOPN is the natural logarithm of uOPN/UCr           | 774.1 (-8.8)         | 786.7 (-6.6)        |
| Urinary CysC on CL                                                                                                                                                                                                                                                                                                                             | (84/UCYSC)**TH2                                                        | 778.2 (-4.7)         | 790.8 (-2.5)        |
| Log urinary CysC on CL                                                                                                                                                                                                                                                                                                                         | TH2**LUCYSC on CL; LUCYSC is the natural logarithm of uCysC/UCr        | 773.9 (-9.0)         | 786.4 (-6.9)        |
| Abbreviations: CysC, cystatin c; EGFR, estimated glomerular filtration rate; KIM-1, kidney injury molecule-1; NGAL, neutrophil gelatinase-associated lipocalin; OPN, osteopontin; PIM3, Pediatric Index of Mortality 3; SCr, serum creatinine; V1, central volume; V2, peripheral volume; V <sub>d</sub> , volume of distribution; WT, weight. |                                                                        |                      |                     |

**Table S3.** Biomarker concentrations at time of PK sampling.

| Biomarker                           | Model training group (n = 30) | Model testing group (n = 20) | Wilcoxon rank sum p-value |
|-------------------------------------|-------------------------------|------------------------------|---------------------------|
| Serum creatinine, mg/dL             | 0.30<br>(0.20–0.48)           | 0.35<br>(0.19–0.50)          | 0.92                      |
| Plasma CysC, mg/L                   | 0.55<br>(0.4–0.7)             | 0.6<br>(0.5–0.8)             | 0.64                      |
| Plasma NGAL, ng/mL                  | 83.6<br>(56.0–178.2)          | 102<br>(74.3–139.2)          | 0.85                      |
| Urine Cysc, ng/mg creatinine        | 103.5<br>(66.5–186.0)         | 121.0<br>(70.7–211.2)        | 0.69                      |
| Urine KIM-1, ng/mg creatinine       | 3.0<br>(1.6–7.6)              | 3.7<br>(1.4–8.0)             | 0.97                      |
| Urine NGAL, ng/mg creatinine        | 60.3<br>(24.1–249.8)          | 35.3<br>(18.7–62.1)          | 0.27                      |
| Urine osteopontin, ng/mg creatinine | 4680.8<br>(2657.2–9449.5)     | 3387.3<br>(1949.1–5614.2)    | 0.35                      |
| Results reported as median (IQR).   |                               |                              |                           |

**Table S4.** Population PK parameter estimates for the full model, eGFR<sub>Hoek</sub> model, and eGFR<sub>Schwartz</sub>.

|                                                                                                                                                                                                                                                                                                                                                                                                                                                                                                                                                                                                                                                                                                                                                                        | Full model                                                        | eGFR <sub>Hoek</sub>                                              | eGFR <sub>Schwartz</sub>                                          |
|------------------------------------------------------------------------------------------------------------------------------------------------------------------------------------------------------------------------------------------------------------------------------------------------------------------------------------------------------------------------------------------------------------------------------------------------------------------------------------------------------------------------------------------------------------------------------------------------------------------------------------------------------------------------------------------------------------------------------------------------------------------------|-------------------------------------------------------------------|-------------------------------------------------------------------|-------------------------------------------------------------------|
|                                                                                                                                                                                                                                                                                                                                                                                                                                                                                                                                                                                                                                                                                                                                                                        | Weighted parameter estimate, median (95 <sup>th</sup> percentile) | Weighted parameter estimate, median (95 <sup>th</sup> percentile) | Weighted parameter estimate, median (95 <sup>th</sup> percentile) |
| <b>CL<sub>0</sub></b>                                                                                                                                                                                                                                                                                                                                                                                                                                                                                                                                                                                                                                                                                                                                                  | 3.31 (2.53–4.22)                                                  | 2.61 (2.10–3.05)                                                  | 2.82 (2.56–3.23)                                                  |
| <b>CL<sub>EGFR</sub></b>                                                                                                                                                                                                                                                                                                                                                                                                                                                                                                                                                                                                                                                                                                                                               | 0.85 (0.22–0.90)                                                  | 1.00 (0.84–1.13)                                                  | 0.32 (0.07–0.76)                                                  |
| <b>CL<sub>NGAL</sub></b>                                                                                                                                                                                                                                                                                                                                                                                                                                                                                                                                                                                                                                                                                                                                               | 0.94 (0.96–1.00)                                                  | N/A                                                               | N/A                                                               |
| <b>V<sub>c0</sub></b>                                                                                                                                                                                                                                                                                                                                                                                                                                                                                                                                                                                                                                                                                                                                                  | 3.50 (2.72–7.09)                                                  | 5.09 (3.23–6.25)                                                  | 5.09 (3.42–5.74)                                                  |
| <b>Q<sub>0</sub></b>                                                                                                                                                                                                                                                                                                                                                                                                                                                                                                                                                                                                                                                                                                                                                   | 7.09 (4.76–7.97)                                                  | 6.18 (4.47–7.76)                                                  | 6.27 (4.49–7.43)                                                  |
| <b>V<sub>p0</sub></b>                                                                                                                                                                                                                                                                                                                                                                                                                                                                                                                                                                                                                                                                                                                                                  | 7.75 (6.63–13.80)                                                 | 8.30 (7.04–12.61)                                                 | 7.33 (6.52–8.62)                                                  |
| <p>Models parameterized as:</p> $CL = CL_0 \cdot (WT/27)^{0.75} \cdot (eGFR/134)^{CL_{EGFR}} \cdot (CL_{NGAL})^{LNGAL}, \text{ for Full model}^a.$ $CL = CL_0 \cdot (WT/27)^{0.75} \cdot (eGFR/134)^{CL_{EGFR}}, \text{ for eGFR}_{Hoek} \text{ model}^a.$ $CL = CL_0 \cdot (WT/27)^{0.75} \cdot (eGFR/156)^{CL_{EGFR}}, \text{ for eGFR}_{Schwartz} \text{ model}^b.$ $V_1 = V_{c0} \cdot (WT/27)^1.$ $Q = Q_0 \cdot (WT/27)^{0.75}.$ $V_2 = V_{p0} \cdot (WT/27)^1.$ <p>LNGAL is the natural logarithm of the urinary NGAL concentration normalized to urinary creatinine (uNGAL/uCr).</p> <p><sup>a</sup> eGFR calculated using plasma cystatin c and Hoek equation.</p> <p><sup>b</sup> eGFR calculated using plasma creatinine and bedside Schwartz equation.</p> |                                                                   |                                                                   |                                                                   |

**Table S5.** Summary of optimal sampling times relative to the end of the vancomycin infusion among model testing group.

|                                                                             | <b>Full model</b> | <b>eGFR<sub>Hoek</sub> model</b> | <b>eGFR<sub>Schwartz</sub> model</b> |
|-----------------------------------------------------------------------------|-------------------|----------------------------------|--------------------------------------|
| Single optimally timed sample                                               |                   |                                  |                                      |
| Mean (standard deviation)                                                   | 2.2 (1.7)         | 2.3 (1.7)                        | 2.9 (1.2)                            |
| Median (range)                                                              | 2 (0–5.4)         | 2.75 (0–4.75)                    | 3.1 (0.4–4.75)                       |
| Two optimally timed samples, first sample                                   |                   |                                  |                                      |
| Mean (standard deviation)                                                   | 0.875 (1.2)       | 1.2 (1.2)                        | 2.25 (1.3)                           |
| Median (range)                                                              | 0.25 (0–3.25)     | 0.5 (0–3.5)                      | 2.75 (0–4.75)                        |
| Two optimally timed samples, second sample                                  |                   |                                  |                                      |
| Mean (standard deviation)                                                   | 3.4 (1.7)         | 3.4 (1.0)                        | 4.2 (0.6)                            |
| Median (range)                                                              | 3.6 (0.75–7)      | 3.25 (1–5.75)                    | 4.25 (3.25–5.0)                      |
| All times reported in hours relative to the end of the vancomycin infusion. |                   |                                  |                                      |

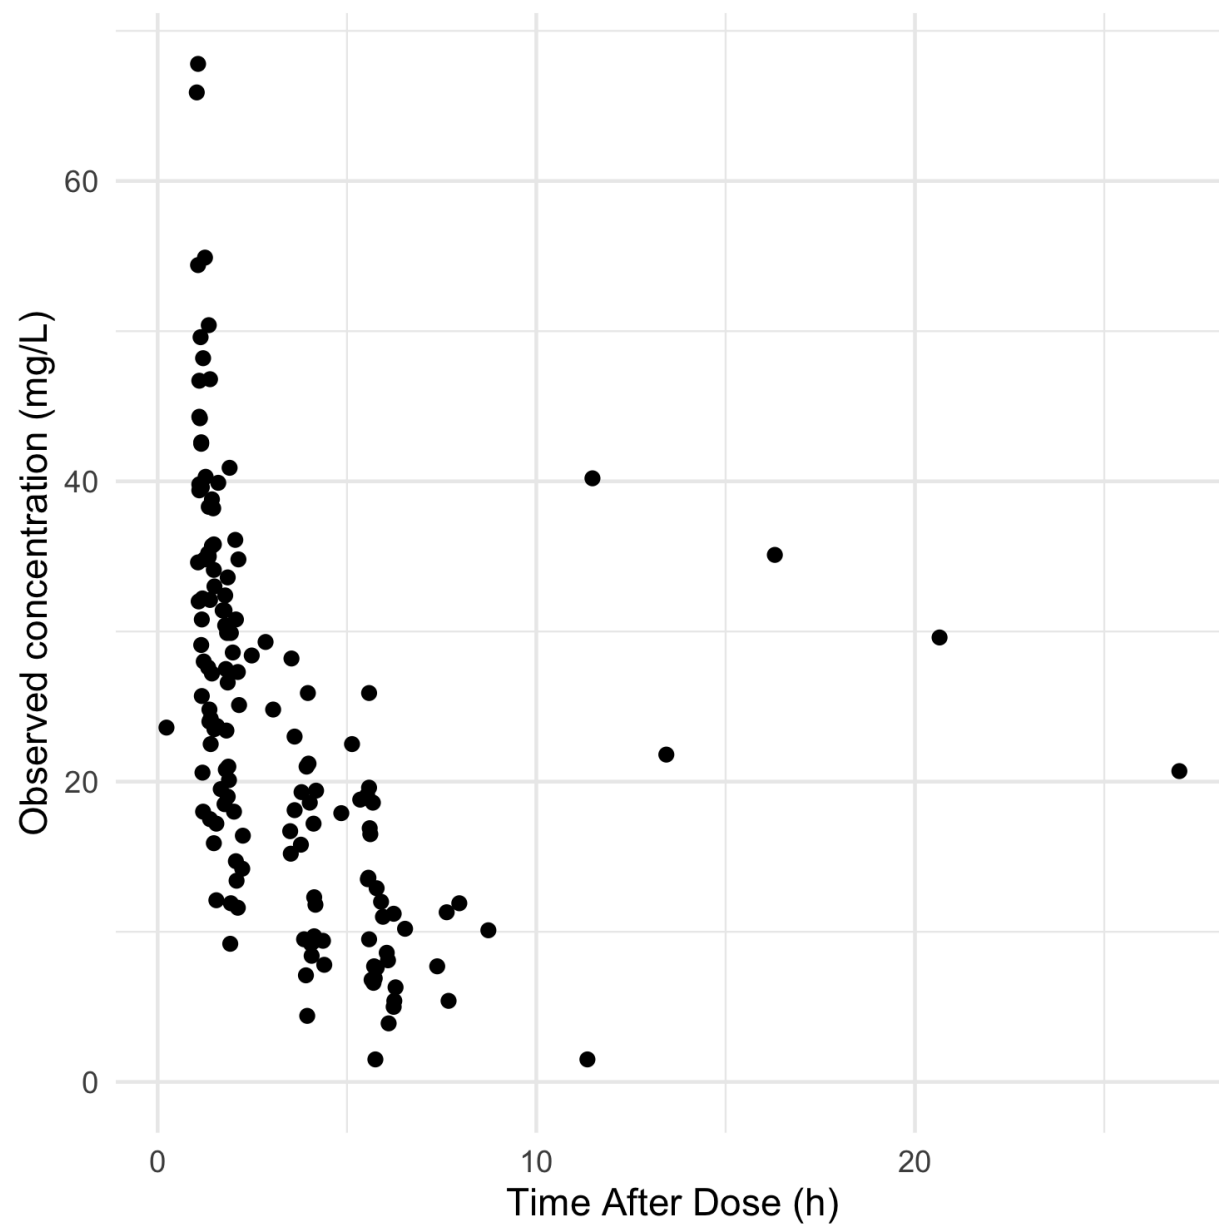

**Figure S1.** Observed concentrations versus time after dose for the model testing group.

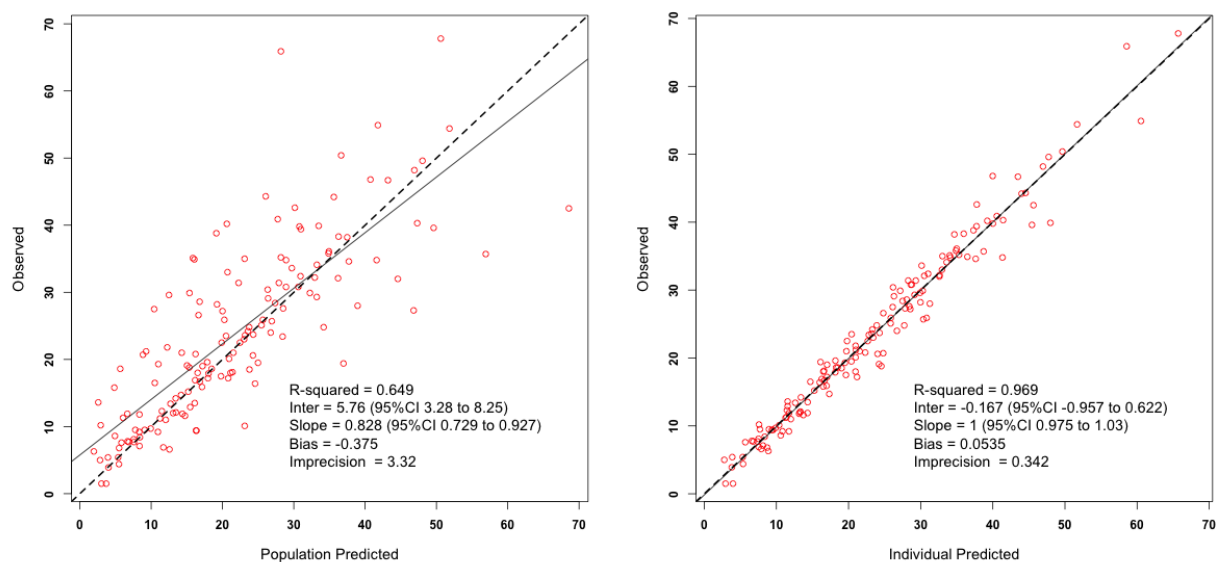

**Figure S2.** Observed versus population and individual predicted concentration plots of the full model.
